# Supplementary material
Source: Springer Nature journal article supplement (https://www.springermedizin.de/resource/supplementary/13075_2013_4065_MOESM8_ESM.pdf/9695970)

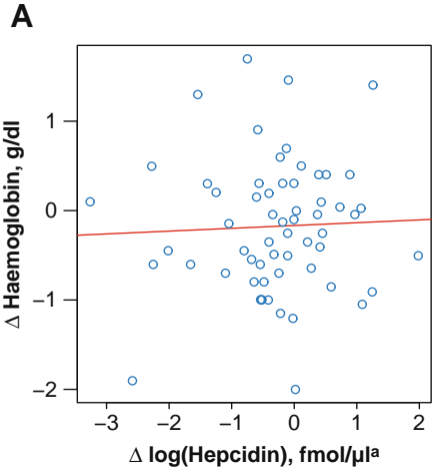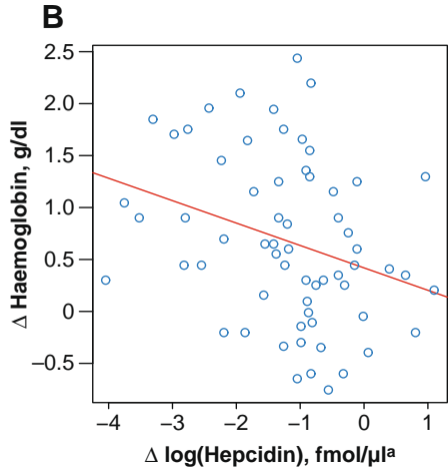

Supplement: MOESM8 [file 9695970]
